# Supplementary material for: The Modelling of Hand, Foot, and Mouth Disease in Contaminated Environments in Bangkok, Thailand
Source: Comput Math Methods Med. 2018 Jun 3;2018:5168931. doi: 10.1155/2018/5168931 (PMC6008700; doi:10.1155/2018/5168931)
Supplement: Supplementary Materials — The basic reproduction number R0. [file 5168931.f1.docx]

**Supplementary Materials:** The basic reproduction number

The basic reproduction number of the model is calculated by using next generation method approach in [[21](#_ENREF_21), [22](#_ENREF_22)]. For this purpose, we set the right hand of the HFMD model (1) to zero as with

, and

The disease free-equilibrium (DFE) of the model (1) is

We can form the next generation matrix at disease free-equilibrium, where

and

Where the constants are , , and .

Hence, the basic reproduction number of is the spectral radius (dominant eigenvalue) of the matrix, namely,

.
